# Supplementary material for: Identification of key factors conquering developmental arrest of somatic cell cloned embryos by combining embryo biopsy and single-cell sequencing
Source: PubMed Central journal article supplement (PMC4897595; doi:10.1038/celldisc.2016.10), 2016-06-07
Supplement: celldisc201610-s1.pdf [file celldisc201610-s1.pdf]

## Supplementary Figure S1 Quality control of single-cell RNA-Seq data.

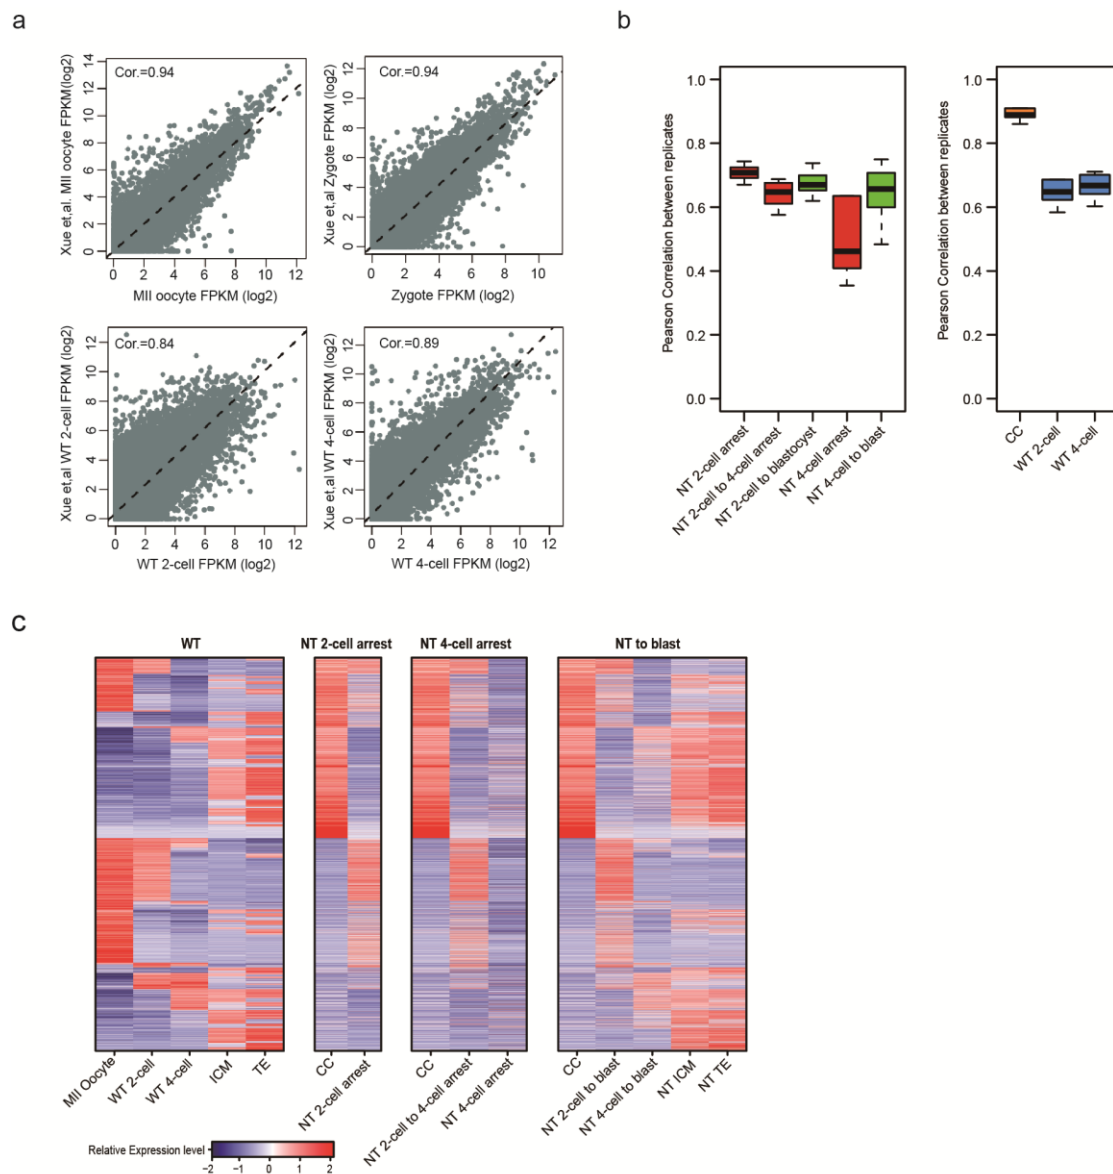

**(a)** Pearson correlation with RNA-Seq datasets at each indicated developmental stage. Correlations were calculated based on FPKM of all Refseq transcripts. Our samples were highly consistent with the published dataset.

**(b)** Boxplot showing the Pearson correlations between each individual single-cell transcriptome within the sample types. The single-cell transcriptome were highly reproducible, except for NT 4-cell arrest samples, which might have abnormal transcriptome profiles in great diversity.

**(c)** Genome-wide expression roadmap of WT and SCNT embryos. Heatmap showed relative gene expression levels during embryogenesis of WT and SCNT embryos with different developmental fates. Genes were clustered using k-means clustering, and only genes with averaged FPKM $\geq$ 1 were used in this analysis.
