# Supplementary material for: Identification of key factors conquering developmental arrest of somatic cell cloned embryos by combining embryo biopsy and single-cell sequencing
Source: PubMed Central journal article supplement (PMC4897595; doi:10.1038/celldisc.2016.10), 2016-06-07
Supplement: celldisc201610-s2.pdf [file celldisc201610-s2.pdf]

**Supplementary Figure S2 PCA analysis on SCNT and WT embryos at 2-cells or 4-cells stage.**

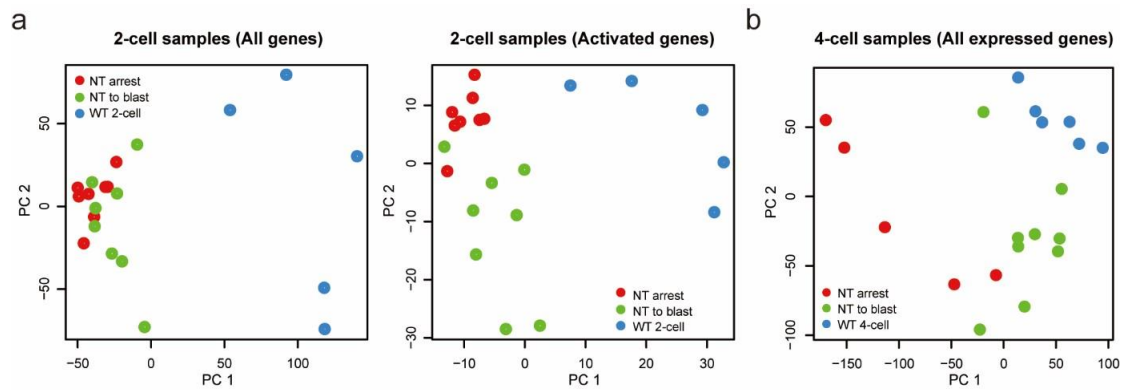

**(a)** PCA analysis of 2-cell samples for all expressed genes (left panel) and ZGA related genes (right panel). Genes with average FPKM  $\geq 1$  across MII and all 2-cell samples were defined as all expressed genes. ZGA related genes were defined as up-regulated genes compared to MII Oocytes in each type of 2-cell stage samples, and the ZGA genes in each condition were pooled to form the final ZGA gene list (3736 genes). Colors represent different types of samples.

**(b)** PCA analysis of the NT 4-cell arrest, NT 4-cell to blastocyst and WT 4-cell samples. All expressed genes were defined by averaged FPKM  $\geq 1$  across all samples of 4-cell stage. Colors represent different types of samples.
