# Supplementary material for: Identification of key factors conquering developmental arrest of somatic cell cloned embryos by combining embryo biopsy and single-cell sequencing
Source: PubMed Central journal article supplement (PMC4897595; doi:10.1038/celldisc.2016.10), 2016-06-07
Supplement: celldisc201610-s3.pdf [file celldisc201610-s3.pdf]

### Supplementary Figure S3 *Kdm4b* and *Kdm4d* expression in WT samples

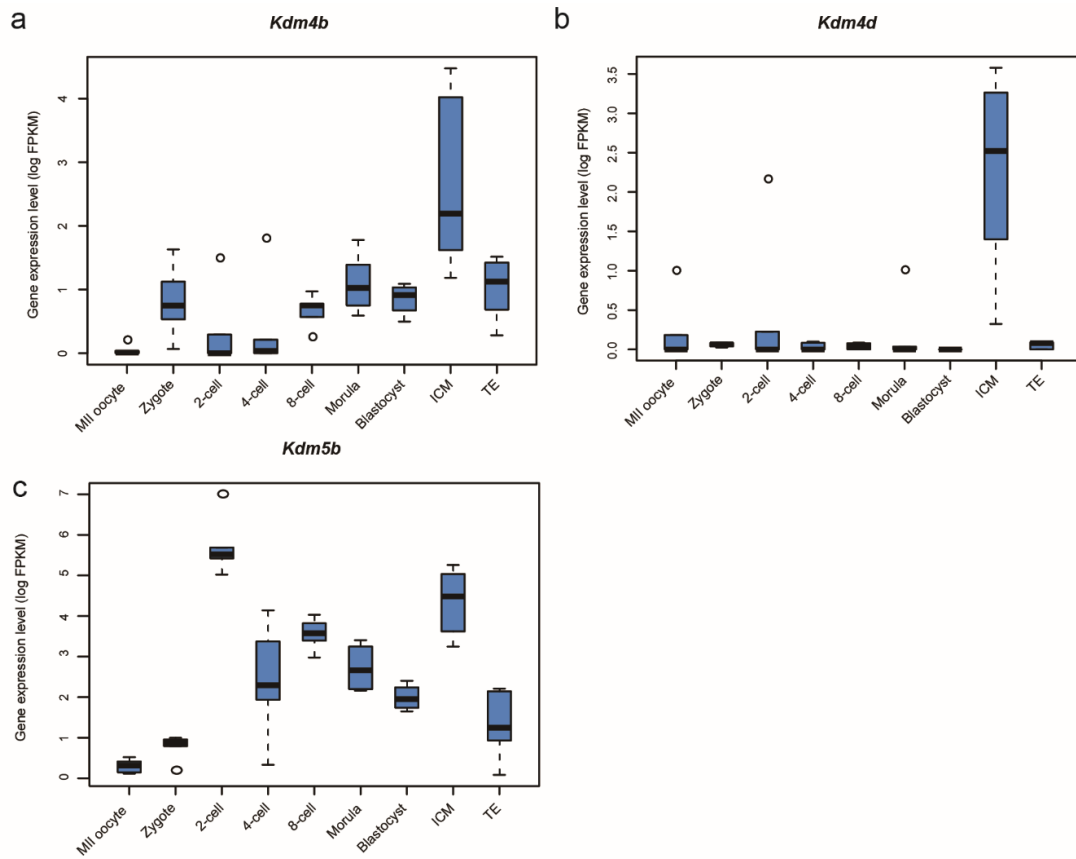

Boxplot showing the expression level of *Kdm4b* (a), *Kdm4d* (b) and *Kdm5b* (c) in each developmental stages of WT embryo. Expression levels were quantified to FPKM with log scale.
