# Supplementary material for: Identification of key factors conquering developmental arrest of somatic cell cloned embryos by combining embryo biopsy and single-cell sequencing
Source: PubMed Central journal article supplement (PMC4897595; doi:10.1038/celldisc.2016.10), 2016-06-07
Supplement: celldisc201610-s4.pdf [file celldisc201610-s4.pdf]

## Supplementary Figure S4 Effective Knockdown and rescue of *Kdm4b* and *Kdm5b* in NT embryos

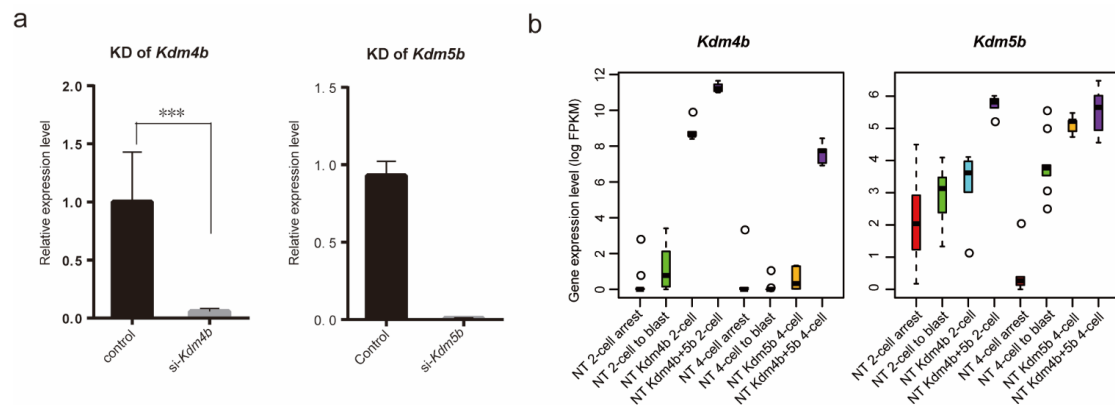

**(a)** *Kdm4b/5b* expression levels were reduced by *Kdm4b/5b* siRNA injection into embryos. RT-qPCR analysis of *Kdm4b/5b* was performed 48 h after injection. The relative expression levels of *Kdm4b/5b* relative to *H2A.Z* were compared with control embryos.

**(b)** Boxplot of *Kdm4b* and *Kdm5b* expression level in single mRNA injected or co-injection samples in 2-cell and 4-cell stage. Higher expression level indicated the successful re-introduction these mRNAs in SCNT embryos.
