# Supplementary material for: Identification of key factors conquering developmental arrest of somatic cell cloned embryos by combining embryo biopsy and single-cell sequencing
Source: PubMed Central journal article supplement (PMC4897595; doi:10.1038/celldisc.2016.10), 2016-06-07
Supplement: celldisc201610-s5.pdf [file celldisc201610-s5.pdf]

**Supplementary Figure S5 Injection of Kdm4b mRNA reduce the H3K9me3 level and restore the expression level of SCNT embryos**

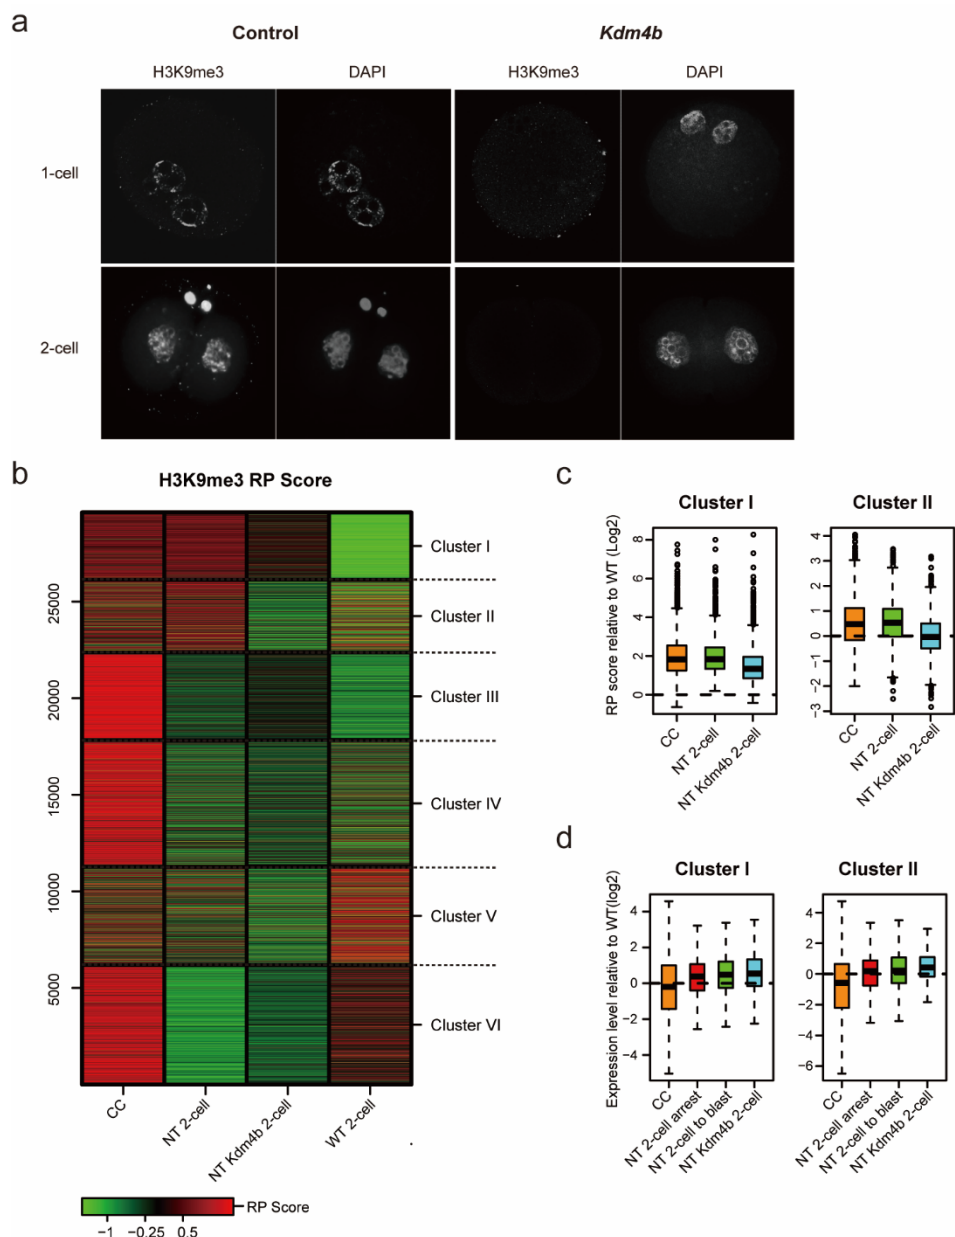

**(a)** Immunofluorescence analysis reveals the removal of H3K9me3 in *Kdm4b* mRNA-injected SCNT embryos. Both 1-cell (top) and 2-cell-stage (bottom) SCNT embryos were stained for H3K9me3, and control (left) and *Kdm4b*-injected (right) SCNT embryos were compared.

**(b)** K-means clustering of distance scaled H3K9me3 signal at promoters of all Refseq transcripts. Rows represent a promoter of Refseq transcript, and columns represent samples. Replicate of each condition were merged in this analysis. Cluster I transcripts (3481 transcripts) and Cluster II transcripts (3767) were identified as potential *Kdm4b* targets.

**(c)** Boxplot of normalized H3K9me3 signals of genes in Cluster I (left panel) and

Cluster II (right panel) relative to WT 2-cell samples in Supplementary Fig. S5b. The H3K9me3 signal showed a clear decrease after *Kdm4b* injected.

**(d)** Boxplot showing gene expression levels relative to WT 2-cell samples of Cluster I and Cluster II transcripts in Supplementary Figure S5b. Unexpressed genes (genes with averaged FPKM  $\leq 1$  ) were removed from this analysis. Expression level of the SCNT samples was subtracted by the expression level of WT 2-cell samples for visualization.
