# Supplementary material for: Identification of key factors conquering developmental arrest of somatic cell cloned embryos by combining embryo biopsy and single-cell sequencing
Source: PubMed Central journal article supplement (PMC4897595; doi:10.1038/celldisc.2016.10), 2016-06-07
Supplement: celldisc201610-s6.pdf [file celldisc201610-s6.pdf]

## Supplementary Figure S6 ESCs and mouse derived from rescued NT embryos

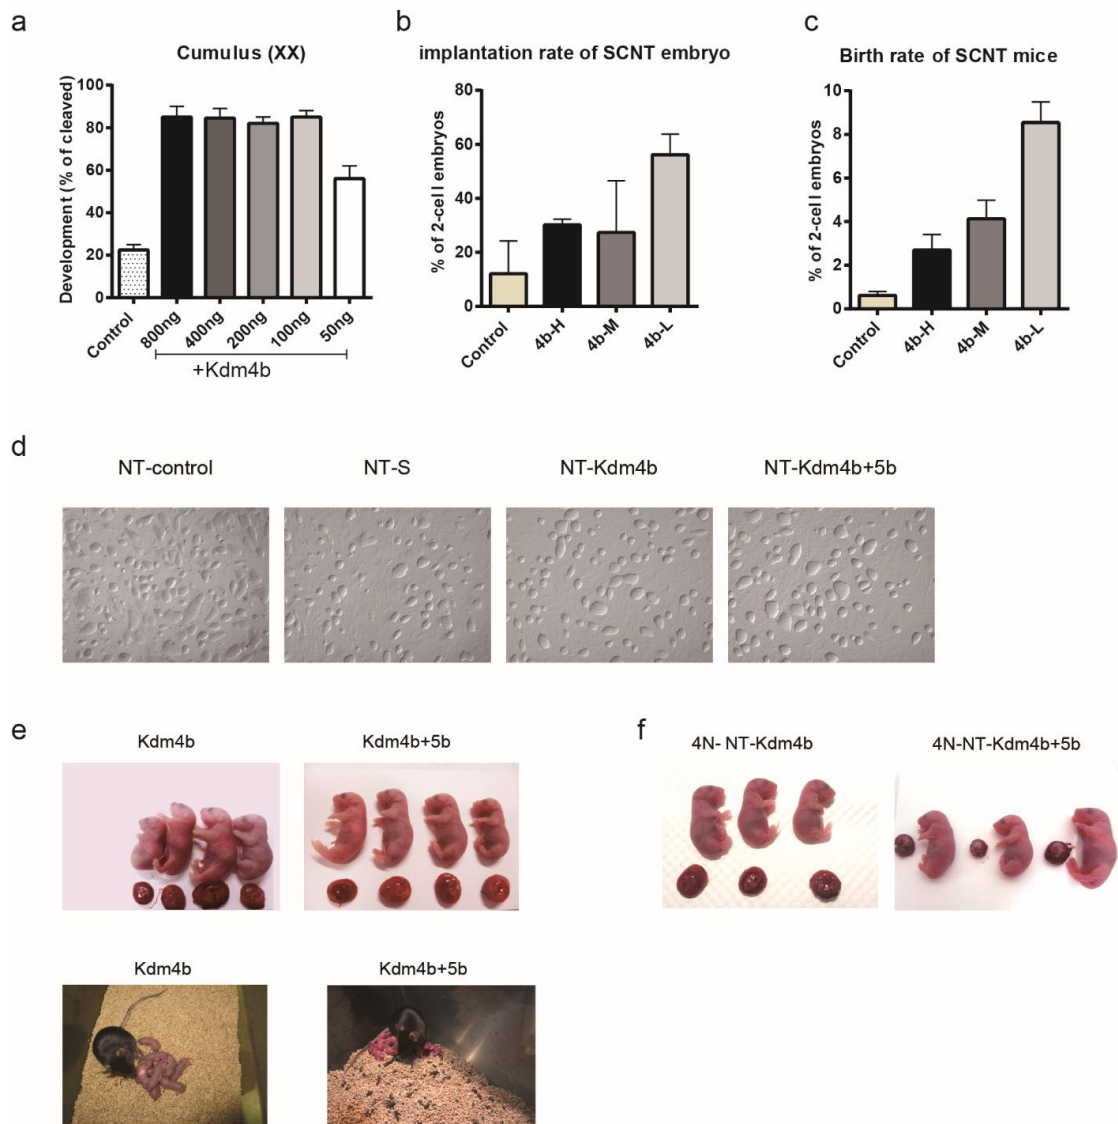

**(a)** Preimplantation developmental rate of SCNT embryos injected with diluted *Kdm4b* mRNA.

**(b-c)** Injection of a lower concentration of *Kdm4b* mRNA greatly improved the implantation **(b)** and birth **(c)** rates of SCNT embryos. High, middle and low concentrations of *Kdm4b* mRNA were used (800, 200, and 100 ng/ $\mu$ l, respectively). The concentration of *Kdm4b* in following experiment is 100ng/ $\mu$ l.

**(d)** Representative images of ntES cell lines produced from the cloned blastocysts.

**(e-f)** Fetuses produced from injected SCNT **(e)** or NT-tetraploid-aggregated embryos **(f)**. The cloned mice from injected SCNT **(e)** could grow to adulthood with normal fecundity.
