# Supplementary material for: Identification of key factors conquering developmental arrest of somatic cell cloned embryos by combining embryo biopsy and single-cell sequencing
Source: PubMed Central journal article supplement (PMC4897595; doi:10.1038/celldisc.2016.10), 2016-06-07
Supplement: celldisc201610-s7.pdf [file celldisc201610-s7.pdf]

## Supplementary Figure S7 Quality control of single cell RRBS-Seq

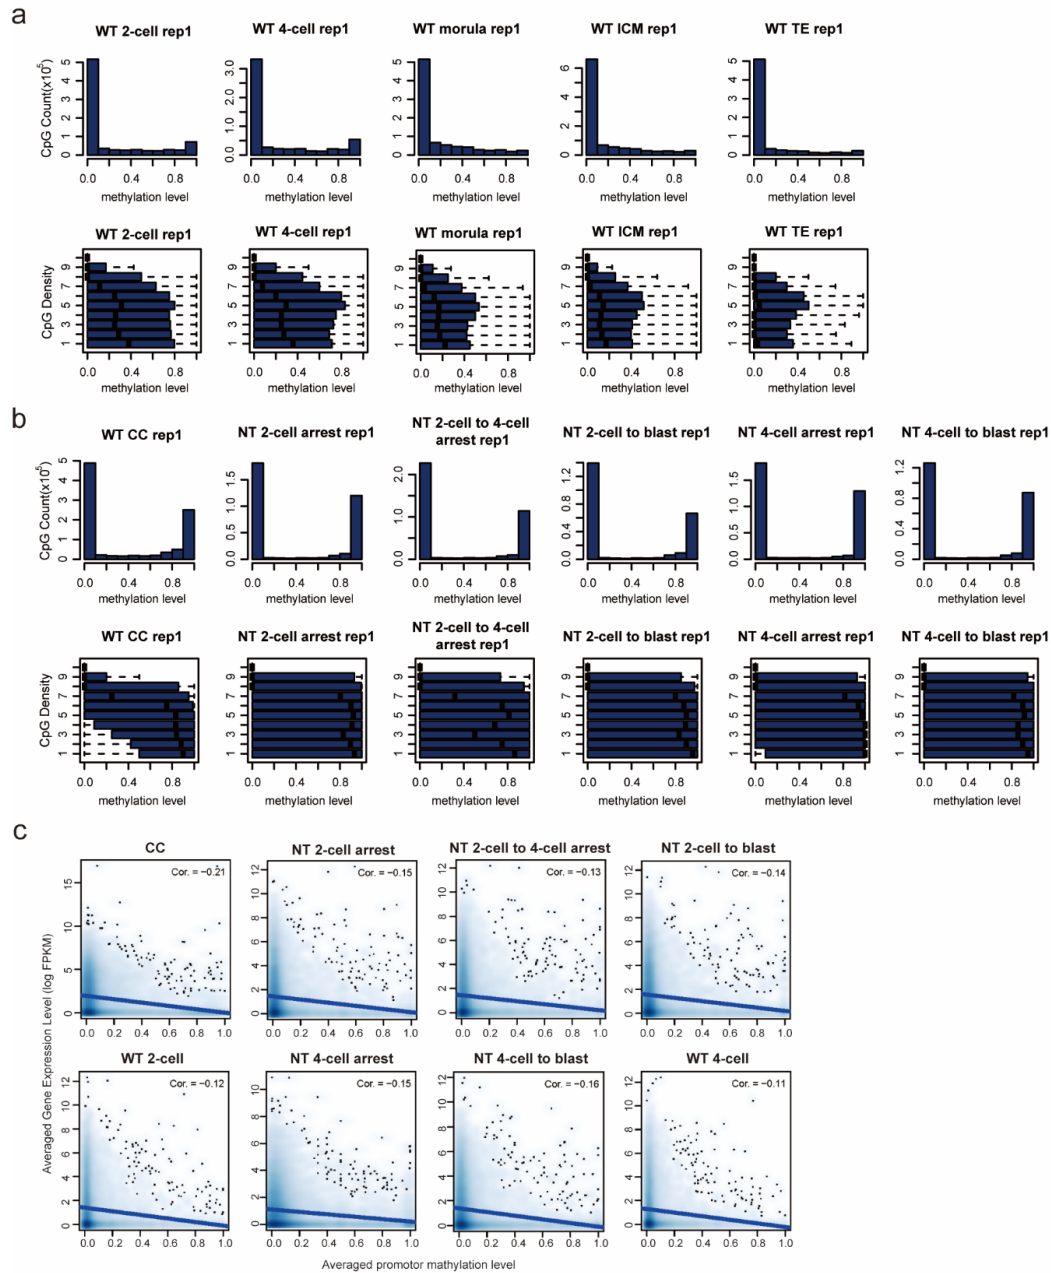

corresponding genes; a linear regression fit curve was plotted. Pearson's correlation values for methylation and expression levels were calculated and presented.
