# Supplementary material for: Identification of key factors conquering developmental arrest of somatic cell cloned embryos by combining embryo biopsy and single-cell sequencing
Source: PubMed Central journal article supplement (PMC4897595; doi:10.1038/celldisc.2016.10), 2016-06-07
Supplement: celldisc201610-s8.pdf [file celldisc201610-s8.pdf]

## Supplementary Figure S8 Correlation of DNA methylation, H3K9me3 level and gene expression level

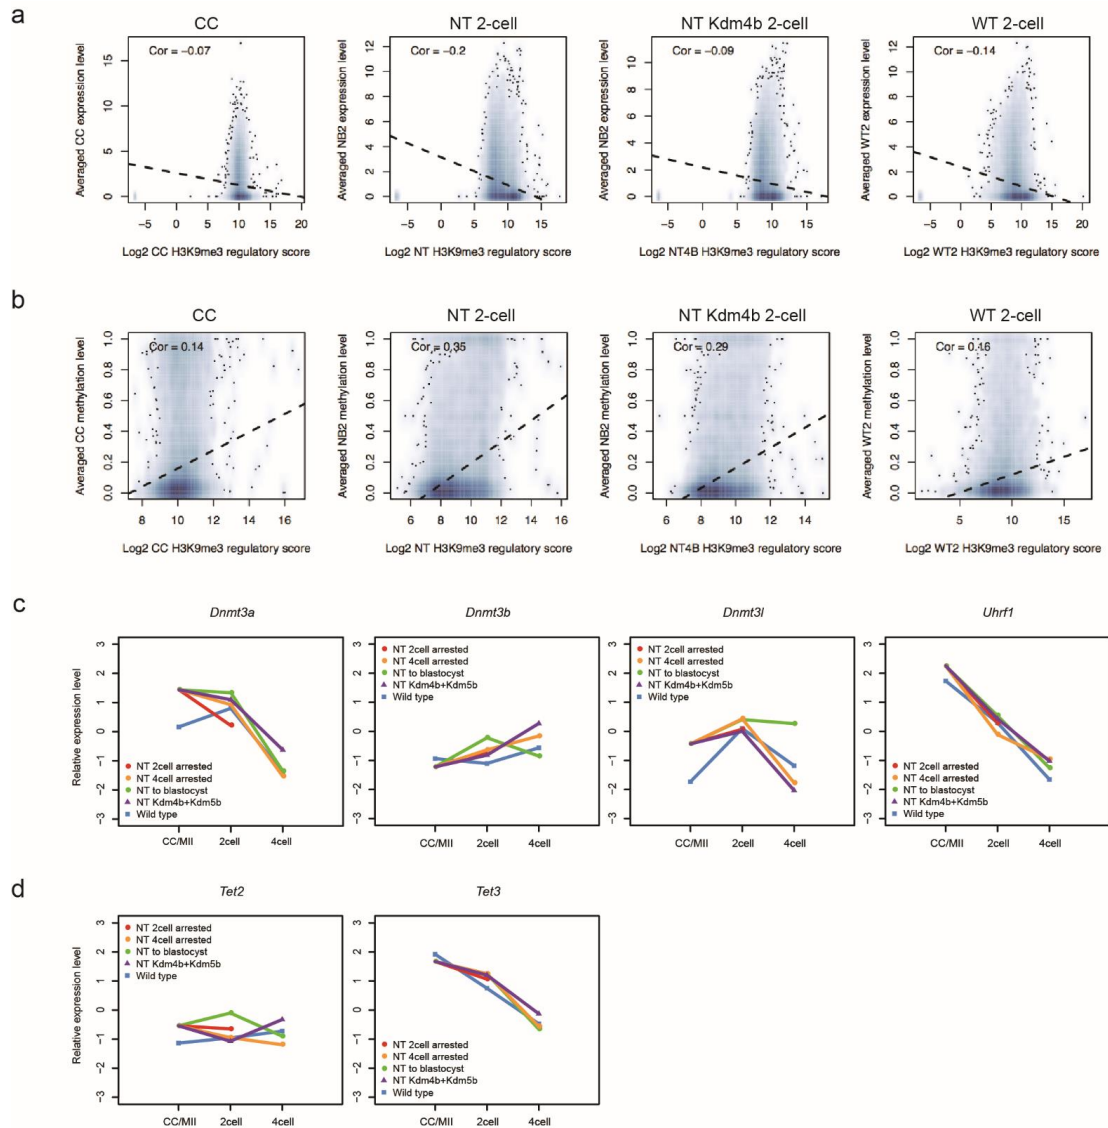

**(a)** Correlation of promoter H3K9me3 levels and gene expression levels in CC, NT, NT+Kdm4b and WT samples. The  $x$ -axis represents the distance scaled H3K9me3 levels of RefSeq gene promoters, and the  $y$ -axis represents the average FPKM of the corresponding genes; a linear regression fit curve was plotted. Pearson's correlation values for H3K9me3 levels and expression levels were calculated and presented.

**(b)** Correlation of promoter H3K9me3 levels and methylation levels in CC, NT, NT+Kdm4b and WT samples. The  $x$ -axis represents the distance scaled H3K9me3 levels of RefSeq gene promoters, and the  $y$ -axis represents the average methylation levels of corresponding promoters, based on the covered CpG sites within  $\pm 2$  kb around the TSS site; a linear regression fit curve was plotted. Pearson's correlation values for methylation and expression levels were calculated and presented.

**(c-d)** Relative expression level of DNA methylation writers **(c)** and erasers **(d)** in SCNT

and WT samples. Expression levels were quantified using FPKM and then normalized based on z-score of different sample types. Transcript with overall highest FPKM was used as the FPKM of the genes.
