# Supplementary material for: Identification of key factors conquering developmental arrest of somatic cell cloned embryos by combining embryo biopsy and single-cell sequencing
Source: PubMed Central journal article supplement (PMC4897595; doi:10.1038/celldisc.2016.10), 2016-06-07
Supplement: celldisc201610-s9.pdf [file celldisc201610-s9.pdf]

**Supplementary Table S1**

Gene lists of the blastocyst-high genes which may account for 2-cell arrest of cloned embryos.

|              |         |              |        |              |         |
|--------------|---------|--------------|--------|--------------|---------|
| NM_175300    | Anapc2  | NM_001081049 | Kmt2a  | NM_199042    | Thap1   |
| NM_008554    | Ascl2   | NM_001033276 | Kmt2d  | NM_001081102 | Whsc1   |
| NM_138679    | Ash1l   | NM_013594    | Mbd1   | NM_011728    | Xpa     |
| NM_030178    | Brpf1   | NM_010774    | Mbd4   | NM_009541    | Zbtb17  |
| NM_178576    | Cpsf4   | NM_013729    | Mixl1  | NM_001276332 | Zbtb34  |
| NM_007837    | Ddit3   | NM_023290    | Mkxn2  | NM_198248    | Zbtb40  |
| NM_178683    | Depdc1b | NM_016662    | Mxd3   | NM_029334    | Zc3h14  |
| NM_001037937 | Deptor  | NM_017373    | Nfil3  | NM_001081016 | Zc3h7b  |
| NM_013874    | Dpfl    | NM_021315    | Noc3l  | NM_001045486 | Zfp180  |
| NM_178609    | E2f7    | NM_010444    | Nr4a1  | NM_013922    | Zfp354c |
| NM_007920    | Elf1    | NM_011023    | Otx1   | NM_172740    | Zfp420  |
| NM_007922    | Elk1    | NM_013633    | Pou5f1 | NM_001033249 | Zfp583  |
| NM_007970    | Ezh1    | NM_010127    | Pou6f1 | NM_001033159 | Zfp597  |
| NM_001146689 | Ezh2    | NM_027504    | Prdm16 | NM_172749    | Zfp646  |
| NM_007971    | Ezh2    | NM_001081355 | Prdm2  | NM_001083958 | Zfp655  |
| NM_001291067 | Foxa2   | NM_144809    | Prdm9  | NM_146259    | Zfp668  |
| NM_010278    | Gfi1    | NM_016703    | Preb   | NM_145916    | Zfp7    |
| NM_026816    | Gtf2f2  | NM_028410    | Prkrir | NM_175466    | Zfp770  |
| NM_008228    | Hdac1   | NM_001163641 | Setdb1 | NM_001037745 | Zfp791  |
| NM_010437    | Hivep2  | NM_001163642 | Setdb1 | NM_145612    | Zfp810  |
| NM_010495    | Id1     | NM_018877    | Setdb1 | NM_001200023 | Zfp963  |
| NM_016849    | Irf3    | NM_001081024 | Setdb2 | NM_009577    | Zik1    |
| NM_018826    | Irx5    | NM_013672    | Sp1    | NM_001081329 | Zkscan2 |
| NM_178637    | Kat5    | NM_001013817 | Sp140  | NM_001013765 | Zscan4c |
| NM_026370    | Kat8    | NM_001163018 | Suz12  | NM_001100186 | Zscan4d |
| NM_172132    | Kdm4b   | NM_199196    | Suz12  |              |         |
| NM_013692    | Klf10   | NM_031182    | Tfap4  |              |         |
