# Supplementary material for: Identification of key factors conquering developmental arrest of somatic cell cloned embryos by combining embryo biopsy and single-cell sequencing
Source: PubMed Central journal article supplement (PMC4897595; doi:10.1038/celldisc.2016.10), 2016-06-07
Supplement: celldisc201610-s10.pdf [file celldisc201610-s10.pdf]

**Supplementary Table S2**

Sequence for siRNA and PCR

| <b>Target sequences of siRNA</b> |            |                                                      |           |
|----------------------------------|------------|------------------------------------------------------|-----------|
| Gene                             | Name       | Target Sequence(5'→3')                               | Reference |
| Kdm4b                            | Kdm4b-si-1 | GCCCATGTGTACTTGGAAATT                                | [1]       |
|                                  | Kdm4b-si-1 | GCCCATTATCCCAATGCTGTA                                |           |
| Kdm5b                            | Kdm5b-si-1 | CTCCGATACATGATTGAAAtt                                | [2]       |
|                                  | Kdm5b-si-2 | TCTTTGCCCTCGGTGTGAC                                  | [3]       |
|                                  | Kdm5b-si-3 | GAGATGCACTCCGATACAT                                  |           |
|                                  |            |                                                      |           |
|                                  |            |                                                      |           |
| <b>Realtime PCR primers</b>      |            |                                                      |           |
| mRNA                             | Strand     | Sequence (5'→3')                                     | Reference |
| Kdm4b                            | F          | CAATGCTGTACGTGTTGCC                                  |           |
|                                  | R          | AAGGGGTTGTTCCCTGTGAG                                 |           |
| Kdm5b                            | F          | AACCGTGAACGGCAACATA                                  |           |
|                                  | R          | AGTCCAGAACCACTTGGTC                                  |           |
| Gapdh                            | F          | CATGGCCTTCCGTGTTCCCTA                                |           |
|                                  | R          | GCCTGCTTCACCACCTTCTT                                 |           |
| <b>cDNA-cloning primers</b>      |            |                                                      |           |
| T7-flag                          | F          | TAATACGACTCACTATAGGGATGGACTACAAAG<br>ACGATGACGATAAA  |           |
| Kdm4a                            | F          | CTACAAAGACGATGACGATAAAATGGCTTCTG<br>AATCAGAACTTTGAAC |           |
|                                  | R          | CTACTCCATGATGGCCCGGTA                                |           |
| Kdm4b                            | F          | ATGGACTACAAAGACGATGACGATAAAGGGTC<br>CGAGGACCACAGC    |           |
|                                  | R          | CTAGAAGGGTGCTCCAGGCC                                 |           |
| Kdm4d                            | T7-F       | TAATACGACTCACTATAGGATGAAGACGAAGT<br>CCACATGTGCTC     |           |
|                                  | R          | TTAGGGGTCGGAGGTCAATCCC                               |           |
| Kdm5b                            | T7-F       | TAATACGACTCACTATAGGATGAAGACGAAGT<br>CCACATGTGCTC     |           |
|                                  | R          | TTACTTTTCGGCTTGGTGCGTC                               |           |
| GFP                              | T7-F       | TAATACGACTCACTATAGGGATGGTGAAGCAAG<br>GGCGAGG         |           |
|                                  | R          | TTACTTGTACAGCTCGTCCATGCCGAG                          |           |

- [1] DAS P P, SHAO Z, BEYAZ S, et al. Distinct and combinatorial functions of Jmjd2b/Kdm4b and Jmjd2c/Kdm4c in mouse embryonic stem cell identity [J]. *Molecular cell*, 2014, 53(1): 32-48.
- [2] MA P, PAN H, MONTGOMERY R L, et al. Compensatory functions of histone deacetylase 1 (HDAC1) and HDAC2 regulate transcription and apoptosis during mouse oocyte development [J]. *Proceedings of the National Academy of Sciences of the United States of America*, 2012, 109(8): E481-9.
- [3] XIE L, PELZ C, WANG W, et al. KDM5B regulates embryonic stem cell self-renewal and represses cryptic intragenic transcription [J]. *The EMBO journal*, 2011, 30(8): 1473-84.
